# Supplementary material for: High-performance intrinsic low-k polymer via the synergistic effect of its three units: adamantyl, perfluorocyclobutylidene and benzocyclobutene
Source: Royal Society of Chemistry journal article supplement (doi:10.1039/c6ra10594g), 2016-01-01
Supplement: c6ra10594g1.pdf [file c6ra10594g1.pdf]

# High Performance Intrinsic Low-*k* Polymer Performed via Taking Synergistic Effect of Its Three Units: Adamantyl- perfluorocyclobutylidene-benzocyclobutene

Lingqiang Kong, Tianke Qi, Zhidong Ren, Yunxia Jin, Yan Li, Yuanrong Cheng, Fei Xiao\*

Department of Materials Science, Fudan University, 220 Handan Road, Shanghai 200433, P.R. China  
Corresponding Author

\* E-mail: feixiao@fudan.edu.cn

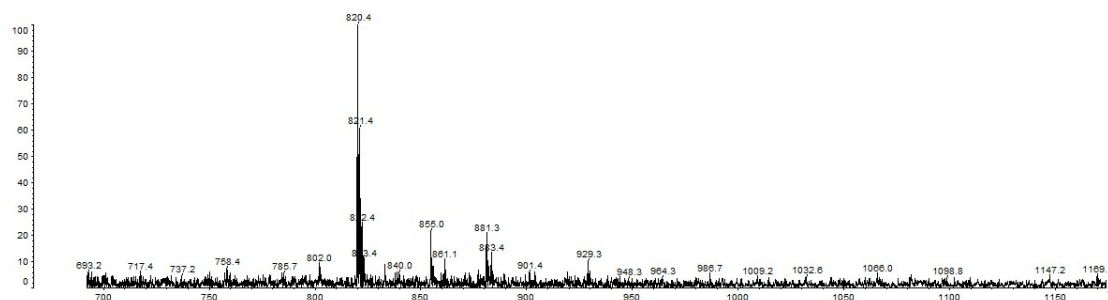

Fig. S1 MALDI-TOF-MS of the BiAdFBCB

---

\* Department of Materials Science, Fudan University, 220 Handan Road, Shanghai 200433, P.R. China  
E-mail: feixiao@fudan.edu.cn

Electronic Supplementary Information (ESI) available: [details of any supplementary information available should be included here]. See DOI: 10.1039/x0xx00000x
